# Supplementary material for: Assessment of the wind energy resource on the coast of China based on machine learning algorithms
Source: Copernicus journal article supplement (doi:10.5194/acp-2022-634), 2022-09-22
Supplement: Supplementary file [file acp-2022-634-AC2-supplement.pdf]

## Response to Reviewer #2's Comments

The work describes the use of Machine Learning algorithms to evaluate the potential of the use of wind energy in different locations in China. While the results are interesting, there are some revisions that need to be taken before it can be accepted.

*Response: We thank the anonymous reviewer for his/her comprehensive evaluation and thoughtful comments, which greatly improve the quality of our manuscript. We have made efforts to adequately address the reviewers' concern one by one. For clarity purpose, here we have listed the reviewer' comments in plain font, followed by our response in bold italics.*

1. First of all, the Introduction section needs to emphasize better the research gaps that this work aims to fill, with clear and updated references to current literature. It could be interesting to know also if there were similar attempts previously and if yes, how this work is different; if not, why a trial was not made? The rest can be summarized.

*Response: Good suggestion! To our knowledge, few previous studies have attempted to assess the wind energy from the radar wind profiler (RWP) network, which can provide wind profiling much higher than the widely used wind tower or mast. This is the major motivation for our present study. At present, wind energy assessment is mainly based on wind tower, reanalysis data or surface observation data. These methods are widely used in the field of wind energy assessment, but each method has certain limitations (Li et al., 2018; Band et al. 2021). The RWP network of China provides a new data support for wind energy assessment. This is the characteristic of our work. However, there exist large uncertainties in the wind profile observations near the ground surface provided by the RWP, largely due to the influence of ground and intermittent clutter (May and Strauch 1998; Allabakash et al., 2019). Therefore, we attempt to use ML algorithms to fill the gap leaved by the RWP measurements near the ground surface. This is the innovation of this work. As such, we rephrased the related descriptions in introduction section and expanded on the progress in this field by updating the references, as follows:*

*“At present, there are three main methods for wind energy assessment. The first is based on the meteorological tower data (Shu et al., 2016; Liu et al., 2018). The height of the meteorological tower is 100-300 m above ground level (AGL), equipped with anemometer and other meteorological observation instruments. Durisic et al. (2012) analyzed the wind energy at four different heights in the South Banat region based on meteorological tower data. But the construction and maintenance costs of meteorological tower are high, and it is not suitable for large-scale networking observation. The second is based on ground meteorological station data, which can be used to evaluate the wind energy at the hub height by empirical formula (Oh et al. 2012; Liu et al., 2019). Li et al. (2018) investigated the spatial and temporal variations of wind energy near Lake Erie shoreline based on the power law method (PLM). The PLM method generally assumes the wind speed below 150 m in the planetary*

*boundary layer (PBL) varies exponentially with height (Hellman et al. 1914). But due to the influence of inhomogeneous underlying surface, land sea difference and ubiquitous atmospheric turbulence, wind varies constantly and greatly in the vertical (Tieleman 1992; Coleman et al., 2021), posing great challenges and uncertainties to wind energy assessment based on surface observation. The third is based on reanalysis data, such as ERA5. It can provide the hourly wind speed at a specific height (Hersbach et al., 2020; Liu et al., 2020). Compared to near-surface in-situ observations, it has better time continuity and spatial coverage, which can provide data support in the region with poor observational data. The hourly resolution of ERA5 reanalysis has been used to assess the wind energy in the absence of observational data (Laurila et al., 2021; Gualtieri, 2021). But the spatial resolution of the ERA5 data is 0.25 \* 0.25 degree, which is much lower than the high-resolution model output such as the weather research and forecasting (WRF) and the point-based observations. These methods are widely used in the field of wind energy assessment (Li et al., 2018; Band et al. 2021), but each method has certain limitations. Therefore, it is necessary to explore more new observation methods to support a comprehensive assessment of wind energy.*

*The radar wind profiler (RWP) network of China can measure the wind profiles from the ground surface to a height of 5-8 km AGL (Liu et al., 2019; Guo et al., 2021a), which provide a novel data source for wind energy assessment. Moreover, increasing wind turbine hub height reduces the impact of surface friction, enabling wind turbines to operate in high-quality wind resource environments (Veers et al., 2019). The RWP can evaluate wind energy at different heights, which is conducive to the selection of wind turbine hub height. Currently, wind turbine is generally installed at the top of wind mast with a height of 100-120 m AGL, which roughly corresponds to the surface layer (Veers et al., 2019). This region is where obstructions such as trees, buildings, hills, and valleys cause turbulence and reduce the wind speed (Stull 1988; Solanki et al., 2022). It leads large uncertainties in the wind profile observations near the ground surface provided by the RWP, largely due to the influence of ground and intermittent clutter (May and Strauch 1998; Allabakash et al., 2019). Therefore, it is necessary to obtain accurate and continuous wind speed at the wind turbine hub height from RWP measurements, which will benefit the robust and scientific assessment of wind energy.”*

*We incorporated all the above-mentioned response into the revised introduction part, in which we also updated the literature reviews by referring to the latest references.*

2. As for the methods, the data and instruments used need to be better described. Also, a description of the study site for a non-Chinese could be worthy. The description of the ML methods is not understandable for a non-expert. Limitations of the methods and of the data are never explained.

*Response: According to your suggestions, we made our best to improve the descriptions of data and instruments.*

*Besides, we described the study sites in terms of geographical distribution. These modifications can be seen in section 2.1, as follows:*

*“Here, eight RWP stations on the coast from north to south in eastern China are selected, including Dongying, Penglai, Qingdao, Lianyungang, Dayang, Dongtou, Fuqing, and Zhuhai. The spatial distribution of these stations is shown in Fig. 1, marked by red points. Most stations are located on land along the coast, only Dayang and Dongtou are located on island (Table 1). Geographically, Dongying, Penglai, Qingdao and Lianyungang are located on Shandong Peninsula of northern China, and the other four stations are located on Yangtze River Delta to Pearl River Delta in south China.”*

*The descriptions of the ML methods were also rephrased, as per your kind suggestion. These modifications can be seen in section 3.2, as follows:*

*“KNN is one of the simplest ML algorithms, which can be used for regression (Coomans et al., 1982). Its basic idea is to find  $k$  nearest neighbors of a sample and assign the average value of these neighbors' attributes to the sample. In this way, the value of the attribute corresponding to the sample can be obtained (Altman, 1992). The schematic diagram of KNN is shown in Fig. S1a. For a given test sample (orange square), it needs to find the nearest  $K$  training samples (inside the gray circle) in the training dataset based on the distance measurement, and then assign the average attribute value of the  $K$  samples to the test sample. Therefore, the setting of  $K$  value is important to the accuracy of the KNN. Here, the KNN algorithm in MATLAB R2020b was used for regression. The code and usage of KNN model are referred to the MATLAB help centre (<https://ww2.mathworks.cn/help/stats/fitcknn.html>, last access: 15 November 2022)”*

*“SVM is a kind of supervised classification algorithm (Cortes et al., 1995), which can also be used in regression. In regression analysis, SVM is to obtain the optimal fitting curve. The schematic diagram of SVM is shown in Fig. S1b. The red line and  $\Delta$  represent the fitting curve and slack variable, respectively. The penalty parameter ( $C$ ) is used to measure the loss caused by outliers. For SVM, it needs to obtain the optimal fitting curve with acceptable loss. The loss of objective function is increased with  $C$  value when the sum of relaxation variables of all outliers is certain. Therefore, it needs to take an appropriate  $C$  to ensure the performance of SVM. Here, the SVM algorithm in MATLAB R2020b was used for regression. In addition, the code and usage of SVM are referred to the MATLAB help centre (<https://ww2.mathworks.cn/help/stats/fitrsvm.html>, last access: 15 November 2022).”*

*“RF is an ensemble ML method (Breiman, 2001), which has been widely used in regressive calculation. It is a method to integrate many decision trees into forests and predict the results. Schematic diagram of RF is shown in Fig. S1c. The RF is composed of many decision trees, and each decision tree is irrelevant. The performance of RF is determined by the aggregation of the results of all the trees*

*(Ma et al., 2021). For RF model, the number of trees is an important parameter to achieve the optimal performance of the model. The further detailed information can be referred to Breiman (2001). Here, we used the RF algorithm for regression in MATLAB R2020b. In addition, the code and usage of RF are referred to the MATLAB help centre (<https://ww2.mathworks.cn/help/stats/treebagger.html>, last access: 15 November 2022)."*

*Limitations of RS, RWP and ERA5 data were also added in manuscript.*

*"One noteworthy drawback is that the operational RS only provide wind profiles twice per day: 0800 and 2000 local solar time (LST)."*

*"Moreover, there exists large uncertainties in the wind profile observations near the ground surface provided by RWP, largely due to the influence of ground and intermittent clutter (May and Strauch 1998; Allabakash et al., 2019)."*

*"But the spatial resolution of the ERA5 data is  $0.25 * 0.25$  degree, which is much lower than the high-resolution model output such as the weather research and forecasting (WRF) and the point-based observations."*

*We also discussed the limitations and uncertainties of methods used in our study, by adding the sensitivity analysis, which is mainly reflected in section 3.3. Part of this revision is shown as follows:*

*"To discuss the generalization of the different methods, we investigated the difference between estimated  $WS_{120}$  and observed  $WS_{120}$  varied with  $WS_{10}$  and  $FV$  (Fig. 4). Since the model is expected to be applicable to various input values, the variation of the deviation with the input features can reflect the generalization of the model. It found that the deviation of the PLM and KNN is change with the increase of  $WS_{10}$  and  $FV$ . It indicated that the generalization of the PLM and KNN need to be improved. The generalization of SVM is better than that of PLM and KNN, but most of the SVM results are still overestimated when  $FV$  is larger than 0.4 m/s. As for RF, the deviation is relatively stable and does not change with the increase of  $WS_{10}$  and  $FV$ . It indicated that the generalization of RF is better than other three methods. This is due to RF adds random disturbance in the sample space, parameter space and model space, thus reducing the impact of "cases" and improving the generalization ability (Breiman, 2001). Moreover, it can be seen from the importance analysis that besides  $WS_{10}$  and  $FV$ , the RF also depends on Char, SHF and  $WS_{300}$ . Fig. S2 shows the difference between estimated  $WS_{120}$  and observed  $WS_{120}$  varied with these three inputs. The deviation is also stable and does not change with the increase of Char, SHF and  $WS_{300}$ . The results show that the RF has a good generalization to the value changes of all input features. For the other stations, similar coastal environment will not significantly change the input features. Therefore, the RF has sufficient generalization and can be used in other stations. In addition, it notes that the ML model needs to be retrained and set new parameters when using in other environments, such as desert area."*

*All these revisions had been incorporated in this revised manuscript.*

3. Finally, as for the results: the discussion should be improved, citing relevant literature to explain them. An effort must be made to take the discussion to a higher scientific level, now it is limited to a qualitative description of the plots, but reasons for the findings are seldom given, often without citing relevant literature. Sometimes, the description of the processes is also not right, or at least superficial. This for instance applies to the effect of turbulence on wind speed. Or for instance to the factors that need to be taken into account into the WS120 estimation: why are they important? Or why are they not?

***Response: Thanks for pointing these issues out. Per your thoughtful and critical comments, we tried our best to improve the discussion and updated the literatures cited in our revised manuscript. Moreover, more in-depth analysis for the finding had been added, especially on the effect of turbulence on wind speed, which was shown as follows:***

***In section 4.1: “The  $WS_{120}$  is affected by turbulence, surface friction and other factors (Tieleman 1992; Solanki et al., 2022). The turbulence caused by inhomogeneous underlying surface can change the wind direction and reduce the horizontal wind speed (Coleman et al., 2021). Especially in coastal areas, the sea land interaction and complex surface types make the variations of near surface wind profiles more complex.”***

***In section 4.3: “This daily cycle of  $WS_{120}$  is mainly affected by the solar radiation and sea-land breeze. On the one hand, the surface is heated by solar radiation at daytime, warming the low-level air. The convection formed by rising warm air mass results in high wind speed during the daytime. After sunset, the surface radiation cools and the air layer tends to stabilize, resulting in a gradual decrease in wind speed (Liu et al., 2018). On the other hand, the difference of specific heat capacity between sea and land can form the difference of thermal properties between sea and land. The difference of air pressure is obvious, which is easy to form sea land breeze (Li et al., 2020).”***

***Regarding why the myriad factors had been considered into the estimate of  $WS_{120}$ , we made the clarification as follows:***

***In section 2.4: “Due to wind is caused by uneven heating of the earth's surface and gradient difference of atmospheric pressure (Solanki et al., 2022). Therefore, nine parameters that may affect the variation of wind speed have been collected, including charnock coefficient (Char), forecast surface roughness (FSR), friction velocity (FV), dew point (DP), temperature (Temp), pressure (Pres), net solar radiation (Rn), latent heat flux (LHF), and sensible heat flux (SHF). Char, FSR and FV are related to surface roughness and friction, and can evaluate the influence of different surface types on the wind speed in the surface layer. DP, Temp and Press are the meteorological parameters associated with wind speed. Rn, LHF and SHF indicate the solar radiation level, which is directly related to the generation of wind.”***

***In section 3.2.4: “Combined with these results, it found that  $WS_{10}$  and FV are mainly input features for these three models.  $WS_{10}$  was the surface 10 m wind speed.***

*FV is a theoretical wind speed at the Earth's surface which increases with the roughness of the surface. This result confirms that the  $WS_{120}$  is mainly affected by the surface wind speed and terrain type. In addition, the importance value of  $WS_{10}$  and  $FV$  for KNN is obviously larger than that of other input. By contrary, for RF, although the importance value of  $WS_{10}$  and  $FV$  is large, the importance value of some input variables is also relatively large with varies from 0.1-0.15. It indicated that the factors such as heat transfer and high-altitude wind speed constraints will also be considered in the inversion process of RF.”*

*All the above response and revisions had been incorporated into section 4 of this revised manuscript.*

4. A strong limitation of the work is that the comparison of observations with model estimations is carried out at a single location, whereas the retrievals are then used at eight different stations. It is not clear if the results obtained at the single station, from which a single ML algorithm was selected, also apply to the other stations, and why.

*Response: Good suggestion! In our opinion, the RF method can be used in other stations. The main reasons are as follows: On the one hand, the RF model has good generalization. The generalization ability is reflected in that the model can give relatively stable output results when inputting different input values (Ma et al., 2021). As shown in Fig. 4, the deviation of RF model is relatively stable and does not change with the increase of  $WS_{10}$  and  $FV$ , which indicates that the RF has good generalization. It is known that RF adds random disturbance in the sample space, parameter space and model space, thus reducing the impact of "cases" and improving the generalization ability (Breiman, 2001). On the other hand, the similar coastal environment in the other stations will not significantly change the input features. Figure S2 shows the distribution of main input variables of RF model ( $WS_{10}$ ,  $FV$ , Char, SHF, and  $WS_{300}$ ) at eight RWP stations. The red dashed lines represent the maximum and minimum values of each variable at Qingdao station. In the range of the red line, the RF can provide stable output due to its good generalization ability. It can be found that almost all the input values of other stations have appeared in Qingdao station. Therefore, the RF model has sufficient generalization and can be used in other coastal stations. In addition, it is noteworthy that the ML model needs to be reconstructed when most of the inputs at a research site are not within the range of the red line.*

*Per your suggestion, we added a section 3.3 to discuss the generalization of the different methods, as follows:*

*“To discuss the generalization of the different methods, we investigated the difference between estimated  $WS_{120}$  and observed  $WS_{120}$ , which as a function of  $WS_{10}$  and  $FV$  (Fig. 4). Since the model is expected to be applicable to various input values, the variation of the deviation with the input features can reflect the generalization of the model (Ma et al., 2021). It was found that the deviation of the PLM and KNN changed with the increase of  $WS_{10}$  and  $FV$ . It indicated that the generalization of the*

*PLM and KNN needed to be improved. The generalization of SVM was better than that of PLM and KNN, but most of the SVM results tended to be still overestimated when FV is larger than 0.4 m/s. As for RF, the deviation was relatively stable and did not change with the increase of WS<sub>10</sub> and FV. This suggested that the generalization of RF was better than other three methods. This could be like due to the fact that RF increased random disturbance in the sample space, parameter space and model space, thereby reducing the impact of "cases" and improving the generalization ability (Breiman, 2001). Moreover, Figure S2 shows the distribution of main input variables of RF model (WS<sub>10</sub>, FV, Char, SHF, and WS<sub>300</sub>) at eight RWP stations. The red dashed lines represent the maximum and minimum values of each variable at Qingdao station. In the range of the red line, the RF can provide stable output due to its good generalization ability. It can be found that almost all the input values of other seven stations have appeared in Qingdao station. Therefore, the RF model is capable of being generalized and can be used in other coastal stations. In addition, it is noteworthy that the ML model needs to be reconstructed when most of the inputs at a research site are not within the range of the red line."*

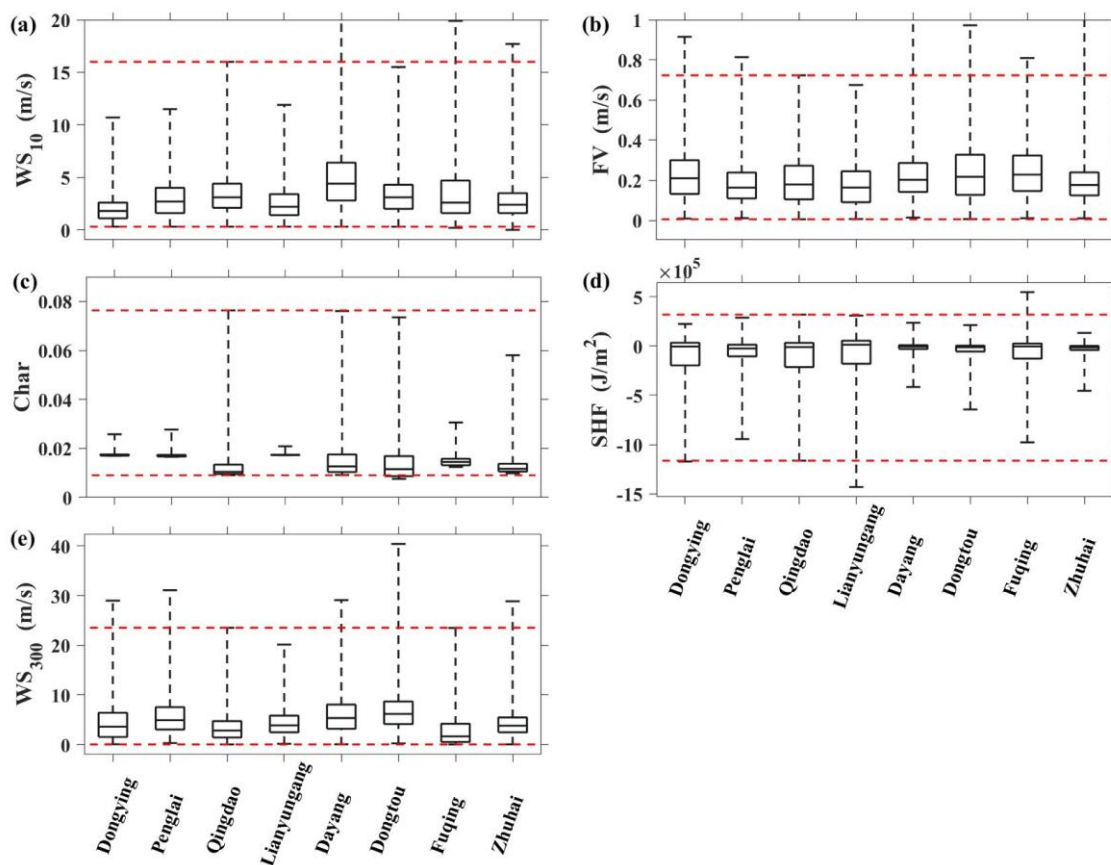

*Figure S2. The box plot of (a) WS<sub>10</sub>, (b) FV, (c) Char, (d) SHF, and (e) WS<sub>300</sub> at eight RWP stations. The red dashed lines represent the maximum and minimum values of each variable at Qingdao station.*

5. Line 9: What do you mean by “goal of carbon emission peak”? Revise.

***Response: It means “peak carbon dioxide emissions”. As a result, it has been corrected in this revision.***

6. Lines 10-13: The reader may not know what is the “traditional power law method” (and therefore in which sense it relies on the constant coefficient to estimate the high-altitude wind speed) and the variety of factors on which it depends. You should explain better which are those factors or at least some of them.

***Response: Per your suggestion, we rephrased this sentence to “The constant assumption may lead to significant uncertainties in wind energy assessment, given the large dependence on a variety of factors, such as terrain, time and height etc.”.***

7. Line 17: Add “of” before “results”. I would also add “with the observations” before “show”. Change “show” to “shows”.

***Response: Amended as suggested.***

8. Lines 18-20: Rephrase: “Based on the WS120 from the RF model, the diurnal variations of WS120 and of wind power density (WPD) were then estimated.”

***Response: Amended as suggested.***

9. Line 23: Change “by” to “based on”.

***Response: Amended as suggested.***

10. Line 25: This is not the unit for wind speed (could be so for WPD).

***Response: Yes, it is the unit for WPD.***

11. Lines 23-26: But for the reader these names are not meaningful. Please indicate the characteristics of the cities (e.g., geographical location).

***Response: Amended as suggested. “In terms of the spatial distribution of the seasonal mean WPD along the coastal region of China, the WPD at Yangtze River Delta are higher than 200 W/m<sup>2</sup> in most seasons, and the WPD at the coastal of Shandong Peninsula and Yangtze River Delta are much greater than at Pearl River Delta.”***

12. Line 28: Change “into” to “for”.

***Response: Amended as suggested.***



13. Lines 33-34: Well, not only carbon dioxide!

***Response: We modified as: “With the rapid economic development of the world, the massive consumption of fossil fuels produces an increasing emission of carbon dioxide, sulfur dioxide and other pollutants”.***

14. Lines 34-35: The link with the previous sentence is missing; and also it is not clear what you mean by “depletion of fossil energy”.

***Response: We modified as: “Large amounts of carbon dioxide and other greenhouse gases cause the greenhouse effect, leading to ever-rising air temperature (Shi et al.,2021). To address this problem, it is increasingly becoming imperative to develop renewable clean energy (Hong et al., 2012).”***

15. Line 39: Delete “had”.

***Response: Amended as suggested.***

16. Lines 39-40: It would be interesting to know a percentage contribution of this source to the total capacity.

***Response: As shown in the Statistical Review of World Energy (2021), the global wind power generation accounts for about 6% of the total power generation in 2020. To better express the innovation of the manuscript, the introduction had been greatly modified. This descriptions with weak relevance were deleted.***

17. Lines 41-42: The link with the previous sentence is not that clear.

***Response: We deleted this sentence.***

18. Line 54: Perhaps you mean that China is currently facing an increasingly serious energy and climate situation?

***Response: Amended as suggested.***

19. Line 56: Again, I cannot understand what is this “carbon emission peak” strategy.

***Response: It should be the “peak carbon dioxide emissions”.***

20. Line 58: Change “has been flourished” to “is flourishing”:

***Response: Amended as suggested.***

21. Lines 59-64: This is not linked with the previous sentence. A break is needed.

***Response: We rewrote this paragraph.***

22. Lines 65-66: This is not true as the boundary layer height varies with day, land use, meteorological conditions, and so on. Please revise.

***Response: We rewrote this paragraph and deleted the sentence.***

23. Lines 68-70: You are making a jump to this theory, without introducing the reader to it and to its meaning.

***Response: We rewrote this paragraph and deleted the sentence.***

24. Lines 70-72: Quite generalistic and without details.

***Response: We revised this sentence as follows:***

***“The second is based on ground meteorological station data, which can be used to evaluate the wind energy at the wind turbine hub height by empirical formula (Oh et al. 2012; Liu et al., 2019). Li et al. (2018) investigated the spatial and temporal variations of wind energy near Lake Erie shoreline based on the power law method (PLM). The PLM method generally assumes the wind speed below 150 m in the planetary boundary layer (PBL) varies exponentially with height (Hellman et al. 1914).”***

25. Line 73: Change “was” to “is”.

***Response: Amended as suggested.***

26. Line 101: Change “developed” to “increased”.

***Response: Amended as suggested.***

27. Lines 100-107 and 109-115 and 117-120 and 122-132: Are these data available somewhere?

***Response: We had added the data acquisition methods in corresponding locations. In addition, the data availability statement is added at the end of manuscript.***

28. Lines 109-115: So are the synoptic (or I assume so based on the statement in the abstract, not repeated here) stations set in the same place as those from the RWP network? This is not clear. The instruments and the data used should be better described.

*Response: Yes, the wind cup anemometer and RWP are located at the same place. We revised this paragraph. “The wind cup anemometer can measure the instantaneous wind speed and is installed at 10 m AGL (Mo et al., 2015). The sensing part of wind cup anemometer is composed of three or four conical or hemispherical empty cups. It can provide surface wind data with an error of less than 10% (Zhang et al., 2020). This device is also installed at eight RWP stations. The 10 m wind speed data can be downloaded in <http://www.nmic.cn/data/cdcdetail/dataCode/A.0012.0001.html> (last access: 15 November 2022).”*

29. Lines 122-124: This seems more like an advertisement rather than a description. Please provide more details.

*Response: We modified as: “The ERA5 is the reanalysis data combining model data and observations, which provides global, hourly estimates of atmospheric variables (Hoffmann et al., 2019). The horizontal resolution can reach 0.25 \* 0.25 degree, and there are 137 vertical levels in vertical direction.”*

30. Line 126: Which surface parameters?

*Response: “surface parameters” changed to “a series of surface parameters such as temperature, humidity, pressure and radiation etc.”*

31. Line 126: The spatial resolution is very rough compared to the granularity of point observations.

*Response: Yes, we agreed with your opinion. Therefore, we added some descriptions in the manuscript, as follows:*

*“But the spatial resolution of the ERA5 data is 0.25 \* 0.25 degree, which is much lower than the high-resolution model output such as the weather research and forecasting (WRF) and the point-based observations.”*

32. Line 130: How did you obtain data at eight stations from gridded data?

*Response: We identified the grid that is closest to each RWP station, and then obtained the gridded data accordingly. To clarify this issue, we rephrase the sentence as follows:*

*“According to the longitude and latitude information of the RWP station, the grid where the RWP station is located is selected and those parameters in the corresponding grid are obtained accordingly.”*

33. Lines 127-130: It is not clear how these parameters affect wind speed. Explanations are needed here or somewhere in the manuscript.

***Response: We added a description to explain the problem. “Due to wind is caused by uneven heating of the earth's surface and gradient difference of atmospheric pressure (Solanki et al., 2022). Therefore, nine parameters that may affect the variation of wind speed have been collected, including charnock coefficient (Char), forecast surface roughness (FSR), friction velocity (FV), dew point (DP), temperature (Temp), pressure (Pres), net solar radiation (Rn), latent heat flux (LHF), and sensible heat flux (SHF). Char, FSR and FV are related to surface roughness and friction and can evaluate the influence of different surface types on the wind speed in the surface layer. DP, Temp and Press are the meteorological parameters associated with wind speed. Rn, LHF and SHF indicate the solar radiation level, which is directly related to the generation of wind.”***

34. Lines 134-136: Rephrase: “In this section, we introduce firstly the classical PLM method to retrieve the WS120 based on 10-m wind speed measurement. Then, we describe the three ML algorithms used to retrieve WS120. We finally present the method for evaluating wind energy.”

***Response: Amended as suggested.***

35. Line 138: Change “assumed” to “assumes”.

***Response: Amended as suggested.***

36. Line 139: Change “has been” to “is”.

***Response: Amended as suggested.***

37. Line 140: Change “formulae” to “formula”.

***Response: Amended as suggested.***

38. Lines 143-144: And what is the value for non coastal locations?

***Response: We added a description to explain the problem. “In engineering application, the value of  $\alpha$  is determined by the terrain type, and the variation range is from 0.1 to 0.4 (Li et al., 2018).”***

39. Line 153: Add “presented” before “as follows”.

***Response: Amended as suggested.***

40. Lines 155-197: To be honest, if one is not expert in those techniques, the explanation is not well understandable. Figures for this Section could be moved to the Appendix, but the explanation of the methods must be rewritten.

**Response:** *According to the suggestions, the schematic diagram was moved to the appendix, and the explanation of the methods has been modified. These modifications can be seen in section 3.2.*

41. Lines 236-237 and 237-238: Not clear: revise.

**Response:** *Amended as suggested. "This is due to the PLM depends on the exponential relationship between  $WS_{120}$  and  $WS_{10}$ . However, the  $WS_{120}$  is affected by turbulence, surface friction and other factors (Tieleman 1992; Solanki et al., 2022). The turbulence caused by inhomogeneous underlying surface can change the wind direction and reduce the horizontal wind speed (Coleman et al., 2021). Especially in coastal areas, the sea land interaction and complex surface types make the variations of near surface wind profiles more complex. Simple exponential relationship is unable to obtain the  $WS_{120}$  with high accuracy, especially at high wind speed condition."*

42. Line 241: Change "significant improvement" to "significantly improved".

**Response:** *Amended as suggested.*

43. Line 243: Change "duo" to "due" and "to it considers" to "to the fact that it considers".

**Response:** *Amended as suggested.*

44. Line 250: Change "By contrast" to "Conversely".

**Response:** *Amended as suggested.*

45. Lines 248-257: The explanation is not clear: revise. Also, I don't understand the need to discuss the difference (a sort of mean bias) when you were discussing the RMSE and R values. Also, it would be needed to understand if the fitting and comparison of model estimations with observations vary with hour of the day, season, or other factors. Also, the discussion could be improved because for instance from Figure 5 I can observe that: RF model is the best but tends to overestimate small values and underestimate high values; similar discussions also for the other models.

**Response:** *Good question! It is due to the ML models is a nonlinear fitting of the input variables to obtain the prediction results. Therefore, the generalization ability of the models is reflected in the stability of the results under different input values.*

This discussion is to explain the sensitivity of the models to input variables and discuss its generalization ability. In this revision, we modified this paragraph and removed it to section 3.3.

In addition, according to your suggestions, we added the comparison of model estimations with observations under different time and different season. The modifications can be seen in section 4.1. The discussion in this section was also improved.

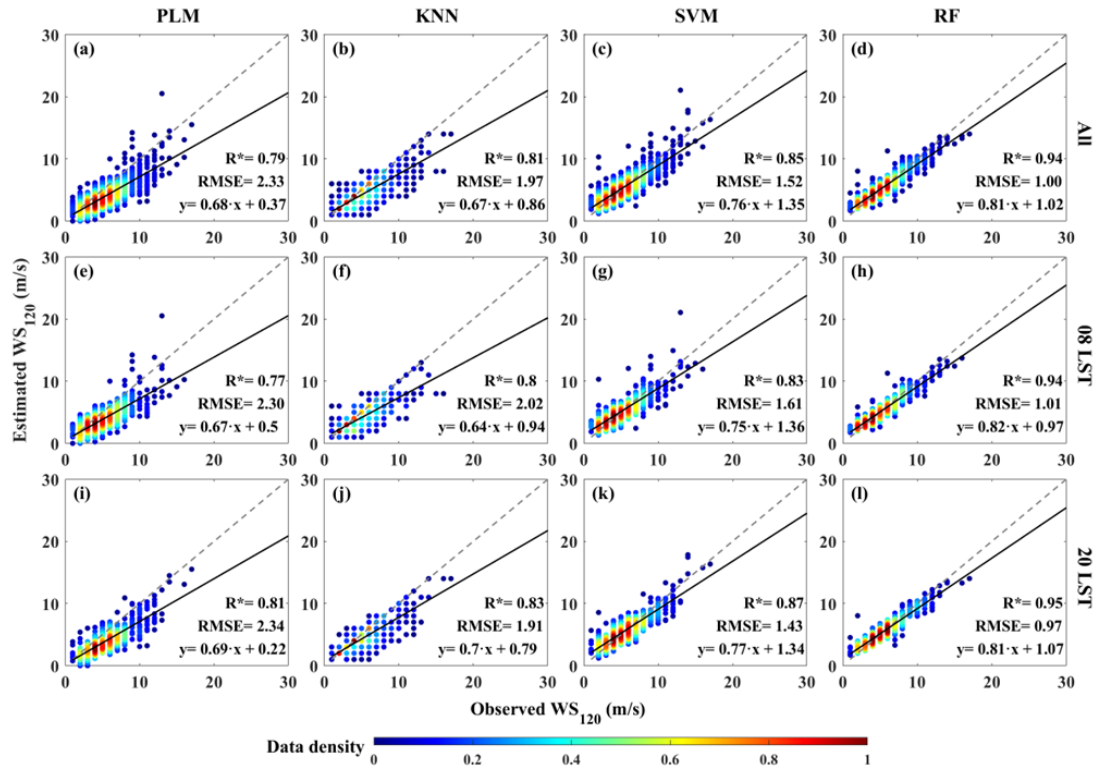

Figure 5. Comparisons between observed  $WS_{120}$  and estimated  $WS_{120}$  based on the (a, e, i) PLM, (b, f, j) KNN, (c, g, k) SVM and (d, h, l) RF models under different time. The gray and black line is the reference and regression line, respectively. The colorbar represents the data density. The asterisk indicates that the correlation coefficient ( $R$ ) passed the statistical significance difference test ( $P < 0.05$ ).

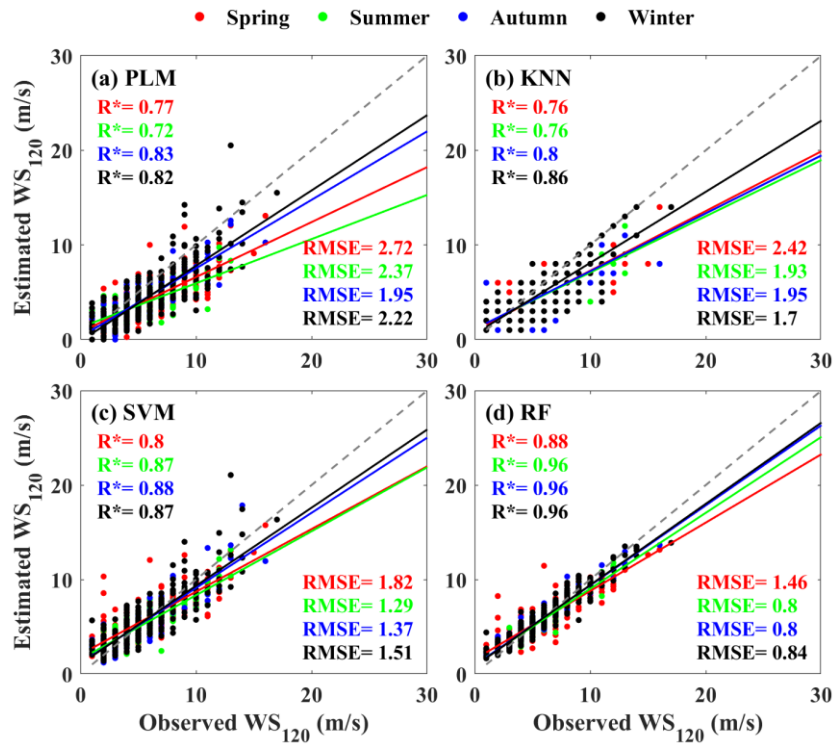

**Figure 6.** Comparisons between observed  $WS_{120}$  and estimated  $WS_{120}$  based on the (a) PLM, (b) KNN, (c) SVM and (d) RF models under different season. The red, green, blue and black represent spring, summer, autumn and winter, respectively. The asterisk indicates that the correlation coefficient ( $R$ ) passed the statistical significance difference test ( $P < 0.05$ ).

“Figure 6 shows the comparisons between the observed  $WS_{120}$  and the estimated  $WS_{120}$  for four methods under different season. The red, green, blue and black represent the spring, summer, autumn and winter, respectively. The PLM performs best in autumn ( $R=0.83$ ,  $RMSE=1.95$  m/s) and worst in summer ( $R=0.72$ ,  $RMSE=2.37$  m/s). The slopes of fitting line at spring, summer, autumn and winter were 0.58, 0.47, 0.72 and 0.8, respectively. It shows that the performance of PLM is affected by seasonal factors. This is due to the wind shear coefficient varies with season (Banuelos-Ruedas et al., 2010). In contrast, the comparison results of ML models are less affected by seasonal factor. The fitting result of KNN at different season is similar except for winter. Similarly, the performance of SVM at spring (winter) is similar to summer (autumn). The slopes of fitting line for SVM at spring, summer, autumn and winter were 0.66, 0.67, 0.8 and 0.82, respectively. As for RF, the fitting result in spring is slightly lower than that in other seasons. The slopes of fitting line at four seasons were ranged from 0.75 to 0.85. This indicates that RF is least affected by seasons. Overall, in terms of stability and accuracy, the RF is the best model to retrieve  $WS_{120}$ .”

46. Lines 259-260: If it is obvious, why do you need to discuss it?

***Response: We deleted this sentence.***

47. Lines 260-263: Can you explain the reason of those seasonal variabilities?

***Response: Amended as suggested. We discussed the reason of those seasonal variabilities in manuscript. "This is due to the influence of East Asia Monsoon and Mongolian cyclones (Yu et al., 2016). The largescale synoptic systems in China have a relatively high occurrence frequency during the cold season (spring and winter), which result in the higher wind speed than warm season (summer and autumn) (Liu et al., 2019)."***

48. Lines 270-271: The mechanism is much more complicated and also variable because of the presence of complex terrain, buildings, sea-land interfaces.

***Response: Modified as "This daily cycle of WS120 is mainly affected by the solar radiation and sea-land breeze. On the one hand, the surface is heated by solar radiation at daytime, warming the low-level air. The convection formed by rising warm air mass results in high wind speed during the daytime. After sunset, the surface radiation cools and the air layer tends to stabilize, resulting in a gradual decrease in wind speed (Liu et al., 2018). On the other hand, the difference of specific heat capacity between sea and land can form the difference of thermal properties between sea and land. The difference of air pressure is obvious, which is easy to form sea land breeze (Li et al., 2020)."***

49. Lines 292-294: Isn't this obvious?

***Response: We deleted this sentence.***

50. Line 293: Change "On the whole" to "Overall".

***Response: Amended as suggested.***

51. Line 313: Change "maximums" to "maximum".

***Response: Amended as suggested.***

52. Table 1: Are you sure about the unit for Altitude (km)? Some altitude values are really high.

***Response: Sorry. The unit should be "m".***

53. Table 2: This Table is not needed, this explanation can be given in the main text.



**Response:** According to the suggestions, this table was moved to the appendix.

54. Figure 4: Please discuss somewhere the importance of the parameters and the reason.

**Response:** The importance of the parameters and the reason were discussed in section 3.2.4.

**“Figure 3 shows the importance analysis of input variables for three ML models. The importance of the variable indicates the dependence of the model on this parameter. The input variables with importance larger than 0.1 were marked by red bar. For KNN, the importance values of  $WS_{10}$ , FV and Char are 0.3, 0.3, and 0.15, which are much larger than that of other inputs. For SVM, the importance values of  $WS_{10}$  and FV are larger than 0.1, while the importance values of other inputs are less than 0.1. For RF, the importance values of  $WS_{10}$ , FV and Char are 0.23, 0.14, and 0.13, respectively. Combined with these results, it found that  $WS_{10}$  and FV are mainly input features for these three models.  $WS_{10}$  was the surface 10 m wind speed. FV is a theoretical wind speed at the Earth's surface which increases with the roughness of the surface. This result confirms that the  $WS_{120}$  is mainly affected by the surface wind speed and terrain type. In addition, the importance values of  $WS_{10}$  and FV for KNN is obviously larger than that of other inputs. By contrary, for RF, although the importance values of  $WS_{10}$  and FV are large, the importance values of some inputs are also relatively large with varies from 0.1-0.15. It indicated that the factors such as heat transfer and high-altitude wind speed constraints will also be considered in the inversion process of RF.”**

55. Figure 5: What is the color of the scatterplot representing?

**Response:** The colorbar represents the data density. Since some data points overlap, the redder the place, the denser the data. We added a description to the caption.

56. Figure 7: The plot is quite strange and is not well presented in the main text and in the caption.

**Response:** Good suggestion! Considering that we also needed to discuss the daily and monthly changes of wind speed in section 4.3, we deleted this plot and moved the relevant discussion to section 4.3.

57. Figure 8: The probability distribution looks quite far from the fitted distributions. Please discuss.

**Response:** Amended as suggested. We discussed the reason of this probability distribution in manuscript. “In addition, it notes that there is a deviation between the probability density function and the frequency of occurrence at some stations. It is due to the Weibull distribution generally has long tail effect, which also indicates right skewed distribution (Pishgar-Komleh et al., 2015).”

58. Figure 9 and 10: Please adjust the scales for the y-axes.

***Response: Amended as suggested.***
